# Supplementary material for: Three-Dimensional Analysis of Posterior Mandibular Displacement in Rats
Source: MDPI journal article supplement (doi:10.3390/vetsci9030144), 2022-03-20
Supplement: s1 [file s1]

**Supplementary Table S1.** Lin's concordance correlation coefficient (rc), Mean difference and Bland–Altman's 95% LOA (Limits of Agreement) between measurements of the first observer.

|                                | <b>rc</b> | <b>p-value</b> | <b>Mean diff.</b> | <b>95% LOA</b>  |
|--------------------------------|-----------|----------------|-------------------|-----------------|
| Go' - Menton Initial           | 0.991     | <0.001         | -0.014            | (-0.211, 0.184) |
| Go - Menton Initial            | 0.988     | <0.001         | -0.001            | (-0.185, 0.184) |
| Coronoid - Menton Initial      | 0.992     | <0.001         | 0.016             | (-0.128, 0.160) |
| Condylion/Go' - Menton Initial | 0.968     | <0.001         | 0.014             | (-0.181, 0.209) |
| Condylion - Go' Initial        | 0.979     | <0.001         | 0.010             | (-0.148, 0.169) |
| Condylion - Menton Initial     | 0.985     | <0.001         | -0.013            | (-0.203, 0.178) |
| Condylion - Id Initial         | 0.991     | <0.001         | -0.010            | (-0.167, 0.146) |
| Condylion - I' Initial         | 0.989     | <0.001         | 0.003             | (-0.168, 0.174) |
| Incisal - Id Initial           | 0.988     | <0.001         | -0.005            | (-0.124, 0.114) |
| Incisal - I' Initial           | 0.992     | <0.001         | -0.004            | (-0.084, 0.076) |
| Intercondylar Initial          | 0.856     | <0.001         | -0.082            | (-0.553, 0.389) |
|                                |           |                |                   |                 |
| Go' - Menton Final             | 0.998     | <0.001         | 0.010             | (-0.161, 0.181) |
| Go - Menton Final              | 0.998     | <0.001         | 0.003             | (-0.153, 0.158) |
| Coronoid - Menton Final        | 0.998     | <0.001         | 0.032             | (-0.105, 0.168) |
| Condylion/Go' - Menton Final   | 0.976     | <0.001         | 0.010             | (-0.295, 0.315) |
| Condylion - Go' Final          | 0.978     | <0.001         | 0.017             | (-0.284, 0.319) |
| Condylion - Menton Final       | 0.998     | <0.001         | 0.000             | (-0.155, 0.155) |
| Condylion - Id Final           | 0.999     | <0.001         | -0.001            | (-0.131, 0.129) |
| Condylion - I' Final           | 0.998     | <0.001         | 0.004             | (-0.163, 0.171) |
| Incisal - Id Final             | 1.000     | <0.001         | -0.005            | (-0.124, 0.114) |
| Incisal - I' Final             | 1.000     | <0.001         | -0.002            | (-0.081, 0.076) |
| Intercondylar Final            | 0.869     | <0.001         | -0.147            | (-0.480, 0.185) |

**Supplementary Table S2.** Lin's concordance correlation coefficient (rc), Mean difference and Bland–Altman's 95% LOA (Limits of Agreement) between measurements of the two observers.

|                                | <b>rc</b> | <b>p-value</b> | <b>Mean diff.</b> | <b>95% LOA</b>  |
|--------------------------------|-----------|----------------|-------------------|-----------------|
| Go' - Menton Initial           | 0.993     | <0.001         | -0.017            | (-0.182, 0.147) |
| Go - Menton Initial            | 0.989     | <0.001         | -0.013            | (-0.186, 0.161) |
| Coronoid - Menton Initial      | 0.992     | <0.001         | 0.005             | (-0.139, 0.148) |
| Condylion/Go' - Menton Initial | 0.967     | <0.001         | -0.001            | (-0.201, 0.198) |
| Condylion - Go' Initial        | 0.977     | <0.001         | -0.004            | (-0.171, 0.163) |
| Condylion - Menton Initial     | 0.986     | <0.001         | -0.011            | (-0.197, 0.174) |
| Condylion - Id Initial         | 0.990     | <0.001         | -0.003            | (-0.171, 0.164) |
| Condylion - I' Initial         | 0.989     | <0.001         | 0.010             | (-0.163, 0.182) |
| Incisal - Id Initial           | 0.980     | <0.001         | -0.011            | (-0.165, 0.143) |
| Incisal - I' Initial           | 0.997     | <0.001         | -0.003            | (-0.052, 0.045) |
| Intercondylar Initial          | 0.870     | <0.001         | -0.050            | (-0.486, 0.386) |
|                                |           |                |                   |                 |
| Go' - Menton Final             | 0.999     | <0.001         | -0.018            | (-0.173, 0.137) |

|                              |       |        |        |                 |
|------------------------------|-------|--------|--------|-----------------|
| Go - Menton Final            | 0.998 | <0.001 | -0.008 | (-0.178, 0.161) |
| Coronoid - Menton Final      | 0.997 | <0.001 | 0.004  | (-0.161, 0.169) |
| Condylion/Go' - Menton Final | 0.988 | <0.001 | 0.021  | (-0.194, 0.236) |
| Condylion - Go' Final        | 0.991 | <0.001 | 0.025  | (-0.164, 0.214) |
| Condylion - Menton Final     | 0.996 | <0.001 | -0.006 | (-0.213, 0.200) |
| Condylion - Id Final         | 0.998 | <0.001 | 0.007  | (-0.171, 0.184) |
| Condylion - I' Final         | 0.998 | <0.001 | 0.023  | (-0.141, 0.186) |
| Incisal - Id Final           | 0.999 | <0.001 | -0.006 | (-0.136, 0.123) |
| Incisal - I' Final           | 1.000 | <0.001 | -0.002 | (-0.084, 0.080) |
| Intercondylar Final          | 0.823 | <0.001 | -0.133 | (-0.603, 0.336) |
